# Supplementary material
Source: publisher figshare collection journal article supplement (https://karger.figshare.com/ndownloader/files/28057467)
Supplement: Supplementary file 1 [file 28057467]

***Supplementary material-online***

***Video S1.*** Parasternal long-axis view showing systolic anterior motion (SAM) of the anterior mitral valve leaflet towards the interventricular septum (arrow) during peak stress of dobutamine infusion.

***Video S2.*** Apical 4-chamber view showing systolic anterior motion (SAM) of the anterior mitral valve leaflet towards the interventricular septum (arrow) during peak stress of dobutamine infusion.

***Video S3.*** Apical 4-chamber view showing systolic anterior motion (SAM) of the anterior mitral valve leaflet towards the interventricular septum (arrow) during peak stress of dobutamine infusion.

***Video S4.*** Apical 3-chamber view showing systolic anterior motion (SAM) of the anterior mitral valve leaflet towards the interventricular septum (arrow) during peak stress of dobutamine infusion.

***Video S5.*** Contrast-enhanced apical 4-chamber view during peak stress of dobutamine infusion showing a normal increase in left ventricular wall thickness, uniform reduction of radial diameters, and a homogenous myocardial perfusion.
